# Supplementary material for: Predicting protein targets for drug-like compounds using transcriptomics
Source: PLoS Comput Biol. 2018 Dec 7;14(12):e1006651. doi: 10.1371/journal.pcbi.1006651 (PMC6300300; doi:10.1371/journal.pcbi.1006651)
Supplement: S2 Text — The rank of the highest-ranking known target for each compound is listed next to their LINCS ID. We achieve top-100 predictions for 32 drugs, a 26% success rate. (XLSX) [file pcbi.1006651.s017.xlsx]

## Sheet: additional_file_1
LINCS ID	Rank of known target
BRD_0x2D_K38775274	29
BRD_0x2D_A82238138	23
BRD_0x2D_A22032524	66
BRD_0x2D_A92177080	86
BRD_0x2D_K46137903	1245
BRD_0x2D_A82371568	1472
BRD_0x2D_A97437073	18
BRD_0x2D_K28307902	1206
BRD_0x2D_A35108200	1402
BRD_0x2D_A23770159	605
BRD_0x2D_A81233518	850
BRD_0x2D_A01643550	155
BRD_0x2D_K56343971	611
BRD_0x2D_K36927236	1163
BRD_0x2D_K76723084	394
BRD_0x2D_K56851771	564
BRD_0x2D_A76528577	1260
BRD_0x2D_K47635719	1441
BRD_0x2D_K76205745	2887
BRD_0x2D_A16998493	496
BRD_0x2D_K18194590	1046
BRD_0x2D_A75144621	79
BRD_0x2D_A78391468	2697
BRD_0x2D_A26711594	1942
BRD_0x2D_K55395145	1196
BRD_0x2D_K73999723	606
BRD_0x2D_K77554836	565
BRD_0x2D_A23637604	2015
BRD_0x2D_A65449987	135
BRD_0x2D_K28936863	2
BRD_0x2D_K15108141	131
BRD_0x2D_K77175907	2294
BRD_0x2D_A20126139	2356
BRD_0x2D_K18135438	23
BRD_0x2D_A69512159	1123
BRD_0x2D_A23723433	547
BRD_0x2D_K31627533	69
BRD_0x2D_K82109576	2607
BRD_0x2D_A79672927	3188
BRD_0x2D_K72238567	266
BRD_0x2D_A70155556	909
BRD_0x2D_K84937637	2088
BRD_0x2D_K84036904	225
BRD_0x2D_A90131694	2
BRD_0x2D_A02180903	2596
BRD_0x2D_A68723818	1784
BRD_0x2D_A27887842	316
BRD_0x2D_K56429665	70
BRD_0x2D_A79768653	77
BRD_0x2D_K32821942	7
BRD_0x2D_K60511616	499
BRD_0x2D_K38003476	15
BRD_0x2D_A63894585	377
BRD_0x2D_K88510285	589
BRD_0x2D_K28143534	2390
BRD_0x2D_K02637541	2822
BRD_0x2D_K00824317	1164
BRD_0x2D_A48720949	59
BRD_0x2D_K97810537	367
BRD_0x2D_A83237092	2513
BRD_0x2D_K32744045	2041
BRD_0x2D_K67174588	2716
BRD_0x2D_A46186775	137
BRD_0x2D_K49328571	190
BRD_0x2D_A77824596	382
BRD_0x2D_A23359898	1193
BRD_0x2D_K27721098	80
BRD_0x2D_A69636825	2513
BRD_0x2D_K60640630	279
BRD_0x2D_K33106058	67
BRD_0x2D_A30815329	13
BRD_0x2D_A29426959	11
BRD_0x2D_A49225603	151
BRD_0x2D_K10916986	1191
BRD_0x2D_K35483542	1508
BRD_0x2D_K43736954	261
BRD_0x2D_K23478508	1547
BRD_0x2D_K66296774	357
BRD_0x2D_A37780065	3041
BRD_0x2D_A81772229	127
BRD_0x2D_K65146499	176
BRD_0x2D_A15297126	2623
BRD_0x2D_K96354014	238
BRD_0x2D_A55393291	40
BRD_0x2D_K17674993	270
BRD_0x2D_A49765801	2669
BRD_0x2D_A62025033	26
BRD_0x2D_K23566484	81
BRD_0x2D_A94756469	4
BRD_0x2D_A07765530	2555
BRD_0x2D_A34299591	719
BRD_0x2D_K11129031	45
BRD_0x2D_A36010170	67
BRD_0x2D_K27316855	705
BRD_0x2D_K53790871	82
BRD_0x2D_K08547377	1069
BRD_0x2D_K47832606	1678
BRD_0x2D_A28746609	2083
BRD_0x2D_K09416995	2646
BRD_0x2D_K97514127	1485
BRD_0x2D_A60414806	295
BRD_0x2D_A22783572	15
BRD_0x2D_A46335897	531
BRD_0x2D_K81169441	2764
BRD_0x2D_K81709173	680
BRD_0x2D_A07440155	643
BRD_0x2D_K34776109	203
BRD_0x2D_K89626439	2384
BRD_0x2D_K49577446	1516
BRD_0x2D_A55594068	35
BRD_0x2D_A60571864	16
BRD_0x2D_A69951442	4
BRD_0x2D_K41260949	1313
BRD_0x2D_A07000685	22
BRD_0x2D_A13133631	282
BRD_0x2D_K90553655	1655
BRD_0x2D_A92439610	2294
BRD_0x2D_M30523314	242
BRD_0x2D_K92428153	807
BRD_0x2D_A26095496	122
BRD_0x2D_K12994359	2171
BRD_0x2D_A96107863	1110
BRD_0x2D_K99369265	7
