# Supplementary material for: Predicting protein targets for drug-like compounds using transcriptomics
Source: PLoS Comput Biol. 2018 Dec 7;14(12):e1006651. doi: 10.1371/journal.pcbi.1006651 (PMC6300300; doi:10.1371/journal.pcbi.1006651)
Supplement: S3 Text — Table lists the 63 ‘hits’ from our validation drug set, including their names, LINCS ID and the number of top-100 predicted targets that had structures available in the PDB. The ranking of the known targets for each compound are shown after our genomic random forest target prediction (GEN), and after our structural re-ranking (STR), along with the percentile rankings produced by alternative target prediction methods HTDocking (HTD) and PharmMapper (PHM). STR, HTD, and PHM values of 100 indicate that the structure of the known target either is not known or was not included in the set of potential targets used by the method. (XLSX) [file pcbi.1006651.s018.xlsx]

## Sheet: additional_file_3
COMPOUND	LINCS ID	Num Structs	GEN	STR	HTD	PHM
alclometasone	BRD-A90131694	76	0.15	0.07	0.54	0.03
beclometasone	BRD-K97810537	77	0.2	0.03	0.49	0.01
betamethasone	BRD-A02180903	81	0.03	0.01	0.09	0
betamethasone	BRD-A92177080	74	0.24	0.01	0.09	0
betamethasone	BRD-K39188321	72	0.26	0.01	0.09	0
bortezomib	BRD-K88510285	66	0.19	0.33	1	1
budesonide	BRD-A60571864	72	0.02	0.1	0.6	0.05
budesonide	BRD-A82238138	74	0.01	0.11	0.6	0.05
budesonide	BRD-A34299591	70	0.44	0.11	0.6	0.05
clobetasol	BRD-A26095496	73	0.02	0.01	0.77	0
clobetasol	BRD-A63894585	58	0.01	0.02	0.77	0
clocortolone	BRD-K38003476	72	0.07	0.01	0.79	0
cortisone	BRD-K43736954	62	0.6	0.02	0.02	0.1
desoximetasone	BRD-A49447682	72	0.59	0.01	0.39	0
dexamethasone	BRD-A35108200	79	0.02	0.01	0.8	0
dexamethasone	BRD-A10188456	75	0.05	0.01	0.8	0
dexamethasone	BRD-K38775274	75	0.05	0.01	0.8	0
dexamethasone	BRD-A93424738	74	0.01	0.01	0.8	0
dexamethasone	BRD-K47635719	71	0.4	0.01	0.8	0
diflorasone	BRD-K17674993	78	0.17	0.01	0.85	0.01
fludroxycortide	BRD-K00824317	75	0.08	0.01	0.72	0.08
fludroxycortide	BRD-A49765801	75	0.04	0.03	0.72	0.08
flunisolide	BRD-A65449987	74	0.58	0.01	0.42	0.1
flunisolide	BRD-K49577446	61	0.64	0.02	0.42	0.1
fluocinonide	BRD-A15297126	48	0.19	0.02	0.86	0.02
fluorometholone	BRD-A13133631	77	0.14	0.01	0.84	0
flutamide	BRD-K28307902	79	0.47	0.29	0.49	0.01
fulvestrant	BRD-A90490067	75	0.07	0.09	0	0.26
fulvestrant	BRD-A83237092	60	0.04	0.1	0	0.26
halcinonide	BRD-K81709173	83	0.05	0.01	0.75	0.01
hydrocortisone	BRD-A46186775	74	0.25	0.03	0.6	0.03
hydrocortisone	BRD-A65767837	68	0.24	0.03	0.6	0.03
irinotecan	BRD-K08547377	76	0.95	0.01	0	1
lovastatin	BRD-A70155556	81	0.3	0.32	0.15	0.1
medrysone	BRD-A20126139	75	0.68	0.01	0.7	0.04
medrysone	BRD-K56515112	63	0.02	0.02	0.7	0.04
mometasone	BRD-K60640630	63	0.05	0.02	0.3	0
paclitaxel	BRD-A23723433	72	0.41	1	1	1
paclitaxel	BRD-A28746609	77	0.05	1	1	1
prednicarbate	BRD-K46137903	54	0.45	0.11	0.65	0.04
prednisolone	BRD-A27887842	78	0.45	0.04	0.08	0
prednisolone	BRD-A01643550	78	0.17	0.04	0.08	0
rimexolone	BRD-K31627533	77	0.02	0.01	0.84	0
simvastatin	BRD-A81772229	62	0.33	0.44	0	0.03
sirolimus	BRD-A79768653	60	0.05	0.82	0.45	0.15
sirolimus	BRD-K89626439	53	0.29	0.83	0.45	0.15
sirolimus	BRD-K84937637	62	0.26	0.87	0.45	0.15
temsirolimus	BRD-A62025033	67	0.24	0.15	0.12	0.03
testosterone	BRD-K90553655	68	0.3	0.01	0.01	0.05
testosterone	BRD-A48720949	74	0.27	0.03	0.01	0.05
testosterone	BRD-A55393291	70	0.3	0.03	0.01	0.05
toremifene	BRD-K67174588	73	0.08	0.01	0.54	0.02
toremifene	BRD-K51350053	72	0.12	0.03	0.54	0.02
triamcinolone	BRD-A37780065	67	0.68	0.01	0.51	0.21
vemurafenib	BRD-K56343971	70	0.11	0.01	0.84	0
vinblastine	BRD-A22783572	60	0.01	1	1	1
vinblastine	BRD-A55594068	60	0.01	1	1	1
vincristine	BRD-K82109576	53	0.46	1	1	1
vincristine	BRD-A60414806	64	0.04	1	1	1
vincristine	BRD-A76528577	59	0.01	1	1	1
vinorelbine	BRD-M30523314	51	0.25	1	1	1
vinorelbine	BRD-K97514127	54	0.24	1	1	1
vinorelbine	BRD-K10916986	62	0.17	1	1	1
